# Supplementary material
Source: MDPI journal article supplement (https://www.mdpi.com/2072-4292/11/16/1868)
Supplement: s1 [file s1]

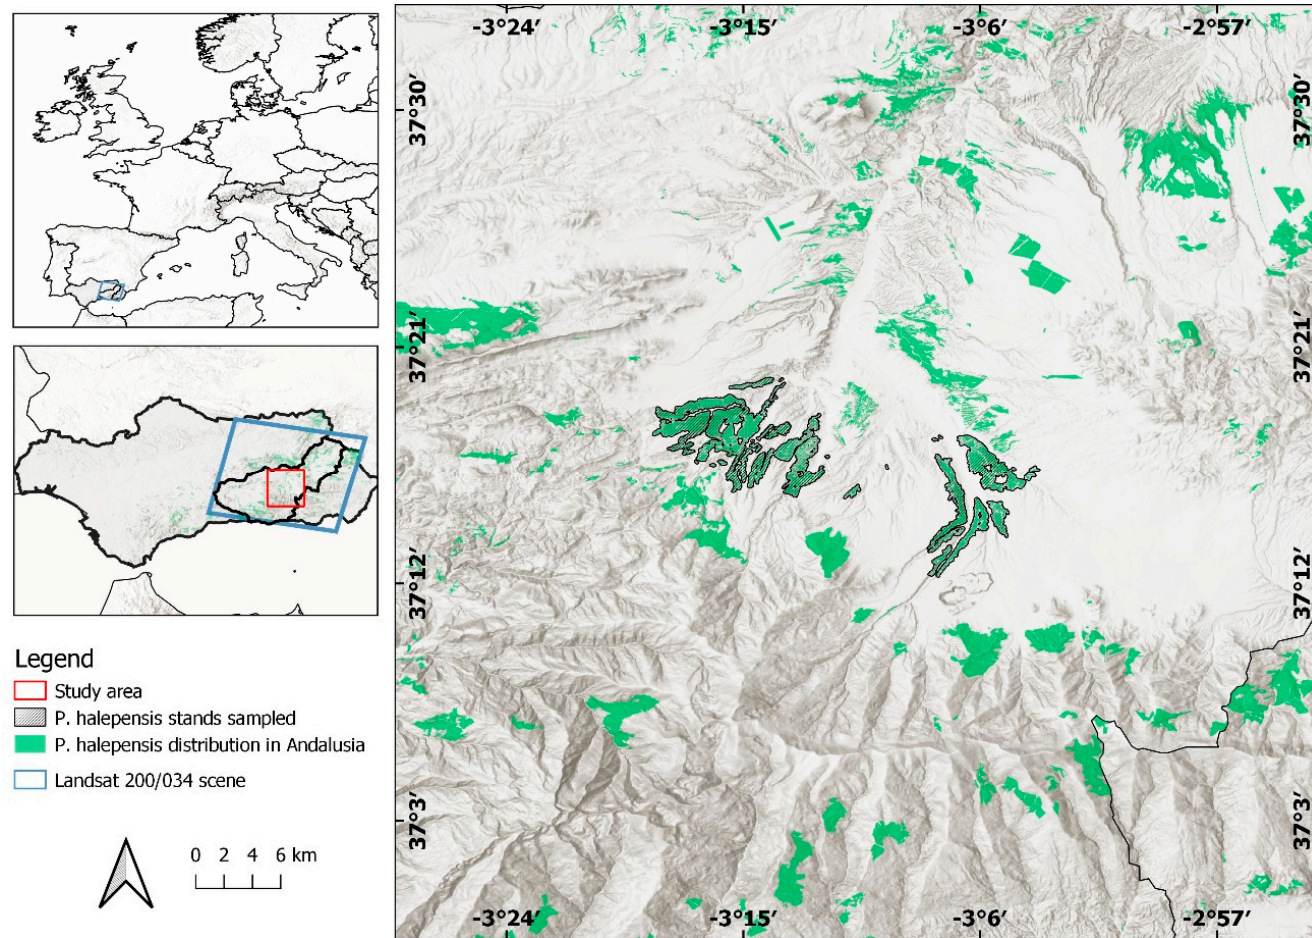

**Figure S1.-** *Pinus halepensis* Mill forests location in South-Eastern Spain and detail of the sampled stands in this work.



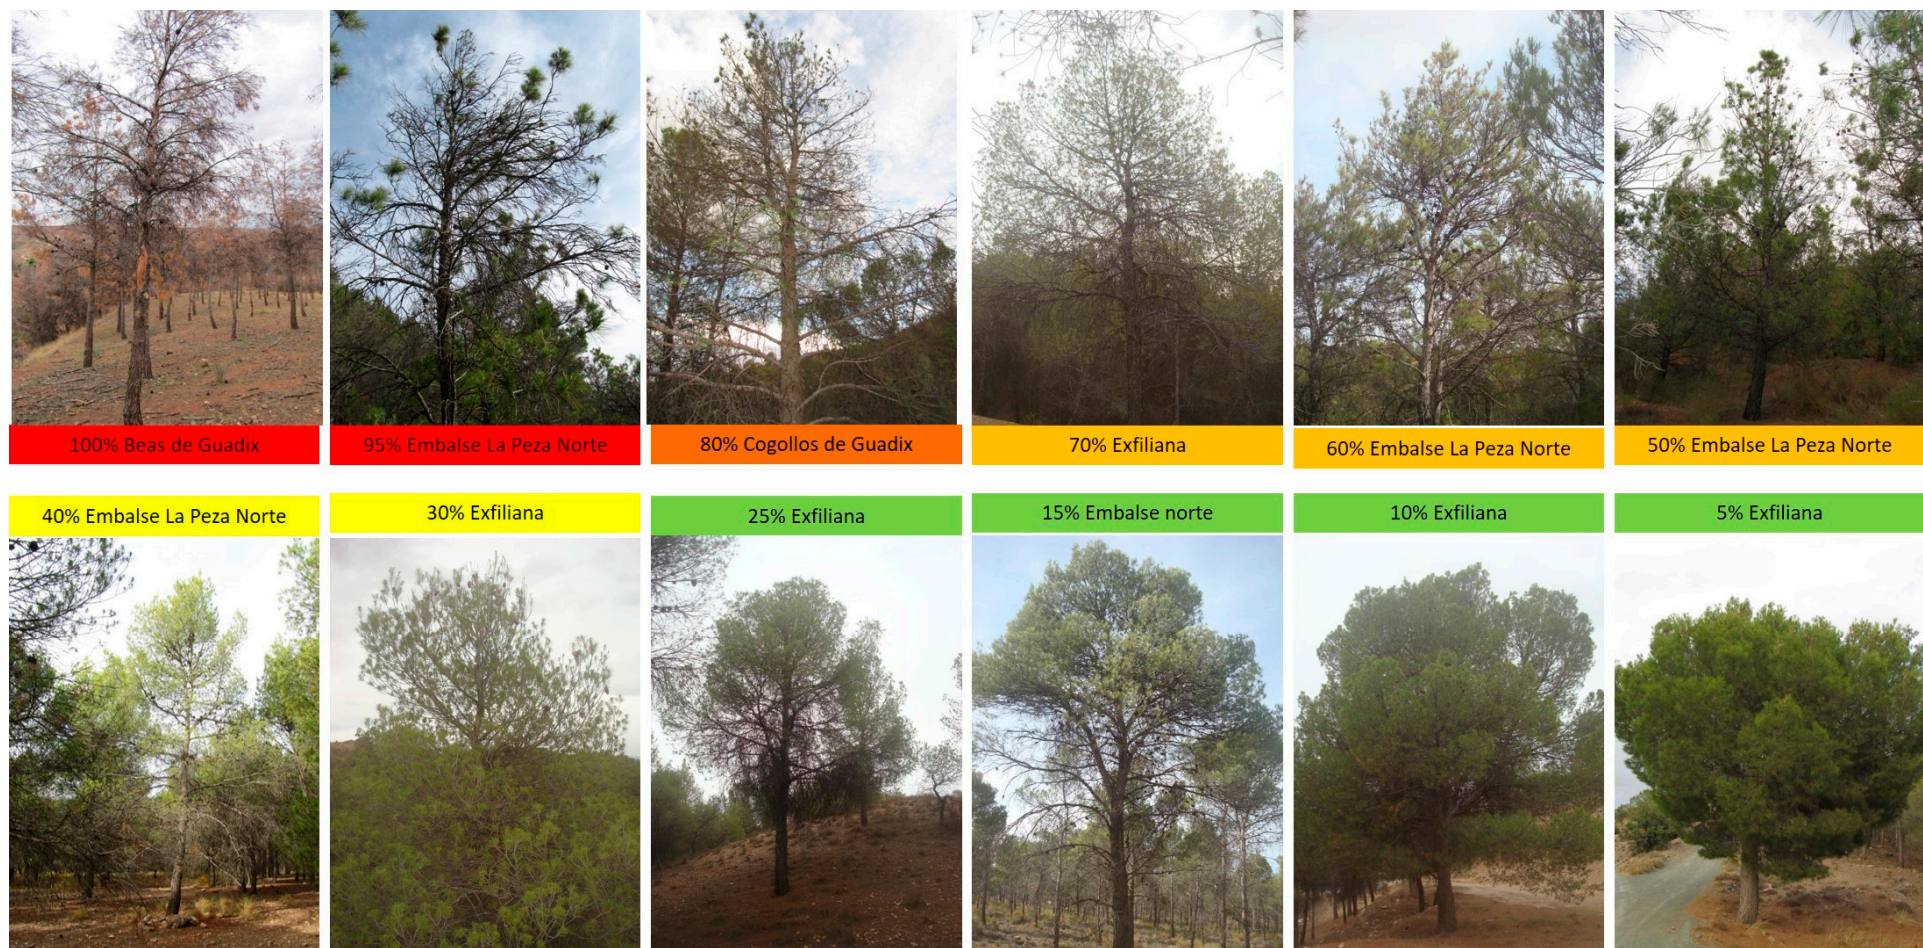

**Figure S2.-** Field defoliation percentage of *Pinus halepensis* Mill in South-Eastern Spain caused by *Candidatus Phytoplasma pini*'

**Table S1:** Forestry characteristics of each species from Third National Forest Inventory of Spain.

| Species                 | Area (ha) | D(Pies/ha) | G (m <sup>2</sup> /ha) | V(m <sup>3</sup> /ha) | Dm(cm) | FCC(%) |
|-------------------------|-----------|------------|------------------------|-----------------------|--------|--------|
| <i>Pinus halepensis</i> | 23076.8   | 117.15     | 2.42                   | 8.02                  | 19.09  | 46.45  |

**Table S2.** LandTrendr parameters used for the segmentation of the NBR Landsat time series.

| Parameter              | Value |
|------------------------|-------|
| maxSegments            | 6     |
| spikeThreshold         | 0.9   |
| vertexCountOvershoot   | 3     |
| preventOneYearRecovery | TRUE  |
| recoveryThreshold      | 0.25  |
| pvalThreshold          | 0.05  |
| bestModelProportion    | 0.75  |
| minObservationsNeeded  | 6     |

**Table S3.-** Environmental data used to predict the defoliation of *Pinus halepensis* Mill in South-Eastern Spain caused by Candidatus Phytoplasma pini’

| Variables                                                                                     | COD       | UNITS                                |
|-----------------------------------------------------------------------------------------------|-----------|--------------------------------------|
| <i>Climatic</i>                                                                               |           |                                      |
| Annual precipitation                                                                          | PRC       | mm                                   |
| Average reference evapotranspiration                                                          | ETO       | mm                                   |
| Average net primary production                                                                | ANPP      | g C m <sup>-2</sup> yr <sup>-1</sup> |
| Annual sum of the positive differences between precipitation and reference evapotranspiration | SSUP      | mm                                   |
| Aridity index                                                                                 | IAR       | -                                    |
| Average mean temperature                                                                      | T_MED     | °C                                   |
| Average minimum temperature                                                                   | T_MIN     | °C                                   |
| Average maximum temperature                                                                   | T_MAX     | °C                                   |
| Average maximum temperature of the warmest months                                             | TMC       | °C                                   |
| Average minimum temperature of coldest months                                                 | TMF       | °C                                   |
| Maximum temperature warmest month                                                             | TMAXC     | °C                                   |
| Minimum temperature coldest month                                                             | TMINF     | °C                                   |
| Average of days with a maximum temperature equal or above 35°C                                | NDC       | Days                                 |
| Average of days with a minimum temperature equal or below 0°C                                 | NDF       | Days                                 |
| Compound topographic index                                                                    | HIDRO_ICT | -                                    |
| Topographic humidity index                                                                    | HIDRO_ITH | -                                    |
| <i>Edaphic</i>                                                                                |           |                                      |
| Average clay content                                                                          | ARC       | %                                    |
| Average fine soil content                                                                     | TF        | %                                    |
| Average organic matter in the soil profile                                                    | MO        | %                                    |
| Average organic matter surface horizon                                                        | MO_SUP    | %                                    |
| Average sand content                                                                          | ARE       | %                                    |
| Average silt content                                                                          | LIM       | %                                    |
| Cation exchange capacity                                                                      | CIC       | meq/100g                             |
| Nitrogen content                                                                              | N_SUP     | %                                    |
| Percent base saturation                                                                       | PBS       | %                                    |
| Soil pH                                                                                       | PH        | -                                    |

|                                               |           |                        |
|-----------------------------------------------|-----------|------------------------|
| Soil depth                                    | PS        | cm                     |
| Water retention capacity                      | CRAD      | mm/m                   |
| <i>Topographic</i>                            |           |                        |
| Aspect                                        | TP_EXPO   | Degree                 |
| Elevation                                     | TP_ELEV   | m                      |
| East – west orientation                       | TP_ES_OE  | Degree                 |
| North to south orientation                    | TP_SU_NO  | Degree                 |
| Slope                                         | TP_PEND   | Degree                 |
| Radiation in spring                           | TP_RSD_P  | Julian/m <sup>2</sup>  |
| Radiation in summer                           | TP_RSD_V  | Julian/ m <sup>2</sup> |
| Radiation in winter                           | TP_RSD_I  | Julian/ m <sup>2</sup> |
| Radiation in autumn                           | TP_RSD_A  | Julian/ m <sup>2</sup> |
| Annual Solar Incidence                        | S_Annual  | Hours                  |
| Monthly Solar Incidence (January to December) | S_01-12   | Hours                  |
| Seasonal Solar Incidence (Winter to Autumn)   | S_win-aut | Hours                  |
